# Supplementary material
Source: HighWire-hosted journal article supplement (https://bmjopen.bmj.com/content/12/7/e062413)
Supplement: inline-supplementary-material-1 [file inline-supplementary-material-1.pdf]

**MEDLINE**

- 1 COVID-19/ or SARS-CoV-2/
- 2 (coronavirus/ or betacoronavirus/ or coronavirus infections/) and (disease outbreaks/ or epidemics/ or pandemics/)
- 3 (nCoV\* or 2019nCoV or 19nCoV or COVID19\* or COVID or SARS-COV-2 or SARSCOV-2 or SARS-COV2 or SARSCOV2 or SARS coronavirus 2 or Severe Acute Respiratory Syndrome Coronavirus 2 or Severe Acute Respiratory Syndrome Corona Virus 2).tw,kf.
- 4 ((new or novel or "19" or "2019" or Wuhan or Hubei or China or Chinese) adj3 (coronavirus\* or corona virus\* or betacoronavirus\* or CoV or HCoV)).tw,kf.
- 5 (long COVID\* or longCOVID\* or postCOVID\* or post-COVID\* or postcoronavirus\* or post-coronavirus\* or postSARS\* or post-SARS\*).tw,kf.
- 6 ((coronavirus\* or corona virus\* or betacoronavirus\*) adj3 (pandemic\* or epidemic\* or outbreak\* or crisis)).tw,kf.
- 7 ((Wuhan or Hubei) adj5 pneumonia).tw,kf.
- 8 1 or 2 or 3 or 4 or 5 or 6 or 7
- 9 limit 8 to yr="2019 -Current"
- 10 animals/ not humans/
- 11 9 not 10
- 12 adolescent/ or child/
- 13 (adolescen\* or child or children or teen\* or youth\*).tw,kf.
- 14 12 or 13
- 15 11 and 14
- 16 limit 11 to ("child (6 to 12 years)" or "adolescent (13 to 18 years)")
- 17 15 or 16
- 18 ((parks or play or playground\*) adj5 (cleaning or closure\* or closed or distancing or restrict\* or limit\* or masks or masking or shutdown\* or shut down\*)).tw,kf.
- 19 ((college\* or school\* or universit\*) adj5 (cleaning or closed or closure\* or distancing or interrupt\* or lockdown\* or limit\* or masks or masking or restrict\* or saniti\* or shutdown\* or shut down\* or suspen\* or ventilat\* or (covid\* adj2 test\*) or (covid\* adj2 vaccin\*))).tw,kf.
- 20 (in-person learning adj5 (interrupt\* or limit\* or restrict\* or suspen\*)).tw,kf.
- 21 home schooling.tw,kf.
- 22 ((at home or hybrid or online or remote) adj (educat\* or learning)).tw,kf.
- 23 ((extracurricular or extra-curricular or intramural or school\* or weekend) adj5 (activities or clubs or hobbies or sports or team or athletes or groups)).tw,kf.
- 24 18 or 19 or 20 or 21 or 22 or 23
- 25 17 and 24
- 26 limit 25 to (comment or editorial or letter)
- 27 25 not 26

**EMBASE**

- 1 COVID-19/ or SARS-CoV-2/
- 2 (coronavirus/ or betacoronavirus/ or coronavirus infections/) and (disease outbreaks/ or epidemics/ or pandemics/)
- 3 (nCoV\* or 2019nCoV or 19nCoV or COVID19\* or COVID or SARS-COV-2 or SARSCOV-2 or SARS-COV2 or SARSCOV2 or SARS coronavirus 2 or Severe Acute Respiratory Syndrome Coronavirus 2 or Severe Acute Respiratory Syndrome Corona Virus 2).tw,kf.
- 4 ((new or novel or "19" or "2019" or Wuhan or Hubei or China or Chinese) adj3 (coronavirus\* or corona virus\* or betacoronavirus\* or CoV or HCoV)).tw,kf.
- 5 (long COVID\* or longCOVID\* or postCOVID\* or post-COVID\* or postcoronavirus\* or post-coronavirus\* or postSARS\* or post-SARS\*).tw,kf.
- 6 ((coronavirus\* or corona virus\* or betacoronavirus\*) adj3 (pandemic\* or epidemic\* or outbreak\* or crisis)).tw,kf.
- 7 ((Wuhan or Hubei) adj5 pneumonia).tw,kf.
- 8 1 or 2 or 3 or 4 or 5 or 6 or 7
- 9 limit 8 to yr="2019 -Current"
- 10 animals/ not humans/
- 11 9 not 10
- 12 adolescent/ or child/
- 13 (adolescen\* or child or children or teen\* or youth\*).tw,kf.
- 14 12 or 13
- 15 11 and 14
- 16 limit 11 to ("child (6 to 12 years)" or "adolescent (13 to 18 years)")
- 17 15 or 16
- 18 ((parks or play or playground\*) adj5 (cleaning or closure\* or closed or distancing or restrict\* or limit\* or masks or masking or shutdown\* or shut down\*)).tw,kf.
- 19 ((college\* or school\* or universit\*) adj5 (cleaning or closed or closure\* or distancing or interrupt\* or lockdown\* or limit\* or masks or masking or restrict\* or saniti\* or shutdown\* or shut down\* or suspen\* or ventilat\* or (covid\* adj2 test\*) or (covid\* adj2 vaccin\*))).tw,kf.
- 20 (in-person learning adj5 (interrupt\* or limit\* or restrict\* or suspen\*)).tw,kf.
- 21 home schooling.tw,kf.
- 22 ((at home or hybrid or online or remote) adj (educat\* or learning)).tw,kf.
- 23 ((extracurricular or extra-curricular or intramural or school\* or weekend) adj5 (activities or clubs or hobbies or sports or team or athletes or groups)).tw,kf.
- 24 18 or 19 or 20 or 21 or 22 or 23
- 25 17 and 24
- 26 limit 25 to (comment or editorial or letter)
- 27 25 not 26

## PsycINFO

- 1 COVID-19/ or SARS-CoV-2/
- 2 (coronavirus/ or betacoronavirus/ or coronavirus infections/) and (disease outbreaks/ or epidemics/ or pandemics/)
- 3 TI ( (nCoV\* or 2019nCoV or 19nCoV or COVID19\* or COVID or SARS-COV-2 or SARSCOV-2 or SARS-COV2 or SARSCOV2 or SARS coronavirus 2 or Severe Acute Respiratory Syndrome Coronavirus 2 or Severe Acute Respiratory Syndrome Corona Virus 2) ) OR AB ( (nCoV\* or 2019nCoV or 19nCoV or COVID19\* or COVID or SARS-COV-2 or SARSCOV-2 or SARS-COV2 or SARSCOV2 or SARS coronavirus 2 or Severe Acute Respiratory Syndrome Coronavirus 2 or Severe Acute Respiratory Syndrome Corona Virus 2) ) OR KW ( (nCoV\* or 2019nCoV or 19nCoV or COVID19\* or COVID or SARS-COV-2 or SARSCOV-2 or SARS-COV2 or SARSCOV2 or SARS coronavirus 2 or Severe Acute Respiratory Syndrome Coronavirus 2 or Severe Acute Respiratory Syndrome Corona Virus 2) )
- 4 TI ( ((new or novel or "19" or "2019" or Wuhan or Hubei or China or Chinese) N3 (coronavirus\* or corona virus\* or betacoronavirus\* or CoV or HCoV)) ) OR AB ( ((new or novel or "19" or "2019" or Wuhan or Hubei or China or Chinese) N3 (coronavirus\* or corona virus\* or betacoronavirus\* or CoV or HCoV))) OR KW ( ((new or novel or "19" or "2019" or Wuhan or Hubei or China or Chinese) N3 (coronavirus\* or corona virus\* or betacoronavirus\* or CoV or HCoV)))
- 5 TI ( (long COVID\* or longCOVID\* or postCOVID\* or post-COVID\* or postcoronavirus\* or post-coronavirus\* or postSARS\* or post-SARS\* ) ) OR AB ( (long COVID\* or longCOVID\* or postCOVID\* or post-COVID\* or postcoronavirus\* or post-coronavirus\* or postSARS\* or post-SARS\* ) ) OR KW ( (long COVID\* or longCOVID\* or postCOVID\* or post-COVID\* or postcoronavirus\* or post-coronavirus\* or postSARS\* or post-SARS\* ) )
- 6 TI ( ((coronavirus\* or corona virus\* or betacoronavirus\*) N3 (pandemic\* or epidemic\* or outbreak\* or crisis)) ) OR AB ( ((coronavirus\* or corona virus\* or betacoronavirus\*) N3 (pandemic\* or epidemic\* or outbreak\* or crisis)) ) OR KW ( ((coronavirus\* or corona virus\* or betacoronavirus\*) N3 (pandemic\* or epidemic\* or outbreak\* or crisis)) )
- 7 TI ( ((Wuhan or Hubei) N5 pneumonia ) ) OR AB ( ((Wuhan or Hubei) N5 pneumonia ) ) OR KW ( ((Wuhan or Hubei) N5 pneumonia ) )
- 8 S1 OR S2 OR S3 OR S4 OR S5 OR S6 OR S7
- 9 animals/ NOT humans/
- 10 S8 NOT S9
- 11 adolescent/ OR child/
- 12 TI ( (adolescen\* or child or children or teen\* or youth\* ) ) OR AB ( (adolescen\* or child or children or teen\* or youth\* ) ) OR KW ( (adolescen\* or child or children or teen\* or youth\* ) )
- 13 S11 OR S12
- 14 S10 AND S13
- 15 S10 AND S13
- 16 S14 OR S15
- 17 TI ( ((parks or play or playground\*) N5 (cleaning or closure\* or closed or distancing or restrict\* or limit\* or masks or masking or shutdown\* or shut down\*)) ) OR AB ( ((parks or play or playground\*) N5 (cleaning or closure\* or closed or distancing or restrict\* or limit\* or masks or masking or shutdown\* or shut down\*)) ) OR KW ( ((parks or play or playground\*) N5 (cleaning or closure\* or closed or distancing or restrict\* or limit\* or masks or masking or shutdown\* or shut down\*)) )
- 18 TI ( ((college\* or school\* or universit\*) N5 (cleaning or closed or closure\* or distancing or interrupt\* or lockdown\* or limit\* or masks or masking or restrict\* or saniti\* or shutdown\* or shut down\* or suspen\* or ventilat\* or (covid\* N2 test\*) or (covid\* N2 vaccin\*))) ) OR AB ( ((college\* or school\* or universit\*) N5 (cleaning or closed or closure\* or distancing or interrupt\* or lockdown\* or limit\* or masks or masking or restrict\* or saniti\* or shutdown\* or shut down\* or suspen\* or ventilat\* or (covid\* N2 test\*) or (covid\* N2 vaccin\*))) ) OR KW ( ((college\* or school\* or universit\*) N5 (cleaning or closed or closure\* or distancing or interrupt\* or lockdown\* or limit\* or masks or masking or restrict\* or saniti\* or shutdown\* or shut down\* or suspen\* or ventilat\* or (covid\* N2 test\*) or (covid\* N2 vaccin\*))) )

- 19 TI ( (in-person learning N5 (interrupt\* or limit\* or restrict\* or suspen\*)) ) OR AB ( (in-person learning N5 (interrupt\* or limit\* or restrict\* or suspen\*)) ) OR KW ( (in-person learning N5 (interrupt\* or limit\* or restrict\* or suspen\*)) ) )
- 20 TI home schooling OR AB home schooling OR KW home schooling
- 21 TI ( ((at home or hybrid or online or remote) N1 (educat\* or learning)) ) OR AB ( ((at home or hybrid or online or remote) N1 (educat\* or learning)) ) OR KW ( ((at home or hybrid or online or remote) N1 (educat\* or learning)) )
- 22 TI ( ((extracurricular or extra-curricular or intramural or school\* or weekend) N5 (activities or clubs or hobbies or sports or team or athletes or groups)) ) OR AB ( ((extracurricular or extra-curricular or intramural or school\* or weekend) N5 (activities or clubs or hobbies or sports or team or athletes or groups)) ) OR KW ( ((extracurricular or extra-curricular or intramural or school\* or weekend) N5 (activities or clubs or hobbies or sports or team or athletes or groups)) )
- 23 S17 OR S18 OR S19 OR S20 OR S21 OR S22
- 24 S16 AND S23
- 25 S16 AND S23
- 26 S24 NOT S25

## Cochrane Central

- 1 [mh ^COVID-19]
- 2 [mh ^SARS-CoV-2]
- 3 (coronavirus or betacoronavirus or coronavirus infections) and (disease outbreaks or epidemics or pandemics)
- 4 (nCoV\* or 2019nCoV or 19nCoV or COVID19\* or COVID or SARS-COV-2 or SARSCOV-2 or SARS-COV2 or SARSCOV2 or SARS coronavirus 2 or Severe Acute Respiratory Syndrome Coronavirus 2 or Severe Acute Respiratory Syndrome Corona Virus 2):ti,ab,kw
- 5 ((new or novel or "19" or "2019" or Wuhan or Hubei or China or Chinese) NEAR/3 (coronavirus\* or corona virus\* or betacoronavirus\* or CoV or HCoV)):ti,ab,kw
- 6 (long COVID\* or longCOVID\* or postCOVID\* or post-COVID\* or postcoronavirus\* or post-coronavirus\* or postSARS\* or post-SARS\*):ti,ab,kw
- 7 ((coronavirus\* or corona virus\* or betacoronavirus\*) NEAR/3 (pandemic\* or epidemic\* or outbreak\* or crisis)):ti,ab,kw
- 8 ((Wuhan or Hubei) NEAR/5 pneumonia):ti,ab,kw
- 9 #1 OR #2 OR #3 OR #4 OR #5 OR #6 OR #7 OR #8
- 10 animals NOT humans
- 11 #9 NOT #10
- 12 [mh ^adolescent]
- 13 [mh ^child]
- 14 (adolescen\* or child or children or teen\* or youth\*):ti,ab,kw
- 15 #12 OR #13 OR #14
- 16 [mh ^adult]
- 17 #15 NOT #16
- 18 #11 AND #17
- 19 ((parks or play or playground\*) NEAR/5 (cleaning or closure\* or closed or distancing or restrict\* or limit\* or masks or masking or shutdown\* or shut down\*)):ti,ab,kw
- 20 ((college\* or school\* or universit\*) NEAR/5 (cleaning or closed or closure\* or distancing or interrupt\* or lockdown\* or limit\* or masks or masking or restrict\* or saniti\* or shutdown\* or shut down\* or suspen\* or ventilat\* or (covid\* NEAR/2 test\*) or (covid\* NEAR/2 vaccin\*)):ti,ab,kw
- 21 ((in-person learning NEAR/5 (interrupt\* or limit\* or restrict\* or suspen\*)):ti,ab,kw
- 22 (home schooling):ti,ab,kw
- 23 (((at home or hybrid or online or remote) NEAR/1 (educat\* or learning))):ti,ab,kw
- 24 ((extracurricular or extra-curricular or intramural or school\* or weekend) NEAR/5 (activities or clubs or hobbies or sports or team or athletes or groups)):ti,ab,kw
- 25 #19 OR #20 OR #21 OR #22 OR #23 OR #24
- 26 #18 AND #25

## ERIC

(MAINSUBJECT.EXACT("COVID-19") AND MAINSUBJECT.EXACT("Pandemics")) OR ((tiab(COVID-19) OR if(COVID-19)) AND (tiab(pandemic\*) OR if(pandemic\*)))

(MAINSUBJECT.EXACT("Adolescents") OR MAINSUBJECT.EXACT("Preadolescents") OR MAINSUBJECT.EXACT("Early Adolescents")) OR (MAINSUBJECT.EXACT("Children") OR MAINSUBJECT.EXACT("Youth")) OR (tiab(adolescenc\* OR preadolescenc\* OR (early NEAR/1 adolescen\*) child\* OR teen\* or youth\*) OR if(adolescen\* OR preadolescenc\* OR (early NEAR/1 adolescen\*) child\* OR teen\* or youth\*))

(tiab(parks NEAR/5 cleaning) OR if(parks NEAR/5 cleaning) OR tiab(parks NEAR/5 closure\*) OR if(parks NEAR/5 closure\*) OR tiab(parks NEAR/5 closed) OR if(parks NEAR/5 closed) OR tiab(parks NEAR/5 distancing) OR if(parks NEAR/5 distancing) OR tiab(parks NEAR/5 restrict\*) OR if(parks NEAR/5 restrict\*) OR tiab(parks NEAR/5 limit\*) OR if(parks NEAR/5 limit\*) OR tiab(parks NEAR/5 masks) OR if(parks NEAR/5 masks) OR tiab(parks NEAR/5 masking) OR if(parks NEAR/5 masking) OR tiab(parks NEAR/5 shutdown\*) OR if(parks NEAR/5 shutdown\*) OR tiab(parks NEAR/5 shut down\*) OR if(parks NEAR/5 shutdown\*)) OR (tiab(play NEAR/5 cleaning) OR if(play NEAR/5 cleaning) OR tiab(play NEAR/5 closure\*) OR if(play NEAR/5 closure\*) OR tiab(play NEAR/5 closed) OR if(play NEAR/5 closed) OR tiab(play NEAR/5 distancing) OR if(play NEAR/5 distancing) OR tiab(play NEAR/5 restrict\*) OR if(play NEAR/5 restrict\*) OR tiab(play NEAR/5 limit\*) OR if(play NEAR/5 limit\*) OR tiab(play NEAR/5 masks) OR if(play NEAR/5 masks) OR tiab(play NEAR/5 masking) OR if(play NEAR/5 masking) OR tiab(play NEAR/5 shutdown\*) OR if(play NEAR/5 shutdown\*) OR tiab(play NEAR/5 shut down\*) OR if(play NEAR/5 shut down\*)) OR (tiab(playground\* NEAR/5 cleaning) OR if(playground\* NEAR/5 cleaning) OR tiab(playground\* NEAR/5 closure\*) OR if(playground\* NEAR/5 closure\*) OR tiab(playground\* NEAR/5 closed) OR if(playground\* NEAR/5 closed) OR tiab(playground\* NEAR/5 distancing) OR if(playground\* NEAR/5 distancing) OR tiab(playground\* NEAR/5 restrict\*) OR if(playground\* NEAR/5 restrict\*) OR tiab(playground\* NEAR/5 limit\*) OR if(playground\* NEAR/5 limit\*) OR tiab(playground\* NEAR/5 masks) OR if(playground\* NEAR/5 masks) OR tiab(playground\* NEAR/5 masking) OR if(playground\* NEAR/5 masking) OR tiab(playground\* NEAR/5 shutdown\*) OR if(playground\* NEAR/5 shutdown\*) OR tiab(playground\* NEAR/5 shut down\*) OR if(playground\* NEAR/5 shut down\*))

## CINAHL

- 1 COVID-19/ or SARS-CoV-2/
- 2 (coronavirus/ or betacoronavirus/ or coronavirus infections/) and (disease outbreaks/ or epidemics/ or pandemics/)
- 3 TI ( (nCoV\* or 2019nCoV or 19nCoV or COVID19\* or COVID or SARS-COV-2 or SARSCOV-2 or SARS-COV2 or SARSCOV2 or SARS coronavirus 2 or Severe Acute Respiratory Syndrome Coronavirus 2 or Severe Acute Respiratory Syndrome Corona Virus 2 ) ) OR AB ( (nCoV\* or 2019nCoV or 19nCoV or COVID19\* or COVID or SARS-COV-2 or SARSCOV-2 or SARS-COV2 or SARSCOV2 or SARS coronavirus 2 or Severe Acute Respiratory Syndrome Coronavirus 2 or Severe Acute Respiratory Syndrome Corona Virus 2 ) ) OR MW ( (nCoV\* or 2019nCoV or 19nCoV or COVID19\* or COVID or SARS-COV-2 or SARSCOV-2 or SARS-COV2 or SARSCOV2 or SARS coronavirus 2 or Severe Acute Respiratory Syndrome Coronavirus 2 or Severe Acute Respiratory Syndrome Corona Virus 2 ) )
- 4 TI ( ((new or novel or "19" or "2019" or Wuhan or Hubei or China or Chinese) N3 (coronavirus\* or corona virus\* or betacoronavirus\* or CoV or HCoV)) ) OR AB ( ((new or novel or "19" or "2019" or Wuhan or Hubei or China or Chinese) N3 (coronavirus\* or corona virus\* or betacoronavirus\* or CoV or HCoV))) OR MW ( ((new or novel or "19" or "2019" or Wuhan or Hubei or China or Chinese) N3 (coronavirus\* or corona virus\* or betacoronavirus\* or CoV or HCoV)))
- 5 TI ( (long COVID\* or longCOVID\* or postCOVID\* or post-COVID\* or postcoronavirus\* or post-coronavirus\* or postSARS\* or post-SARS\* ) ) OR AB ( (long COVID\* or longCOVID\* or postCOVID\* or post-COVID\* or postcoronavirus\* or post-coronavirus\* or postSARS\* or post-SARS\* ) ) OR MW ( (long COVID\* or longCOVID\* or postCOVID\* or post-COVID\* or postcoronavirus\* or post-coronavirus\* or postSARS\* or post-SARS\* ) )
- 6 TI ( ((coronavirus\* or corona virus\* or betacoronavirus\*) N3 (pandemic\* or epidemic\* or outbreak\* or crisis)) ) OR AB ( ((coronavirus\* or corona virus\* or betacoronavirus\*) N3 (pandemic\* or epidemic\* or outbreak\* or crisis)) ) OR MW ( ((coronavirus\* or corona virus\* or betacoronavirus\*) N3 (pandemic\* or epidemic\* or outbreak\* or crisis)) )
- 7 TI ( ((Wuhan or Hubei) N5 pneumonia ) ) OR AB ( ((Wuhan or Hubei) N5 pneumonia ) ) OR MW ( ((Wuhan or Hubei) N5 pneumonia ) )
- 8 S1 OR S2 OR S3 OR S4 OR S5 OR S6 OR S7
- 9 animals/ NOT humans/
- 10 S8 NOT S9
- 11 adolescent/ OR child/
- 12 TI ( (adolescen\* or child or children or teen\* or youth\* ) ) OR AB ( (adolescen\* or child or children or teen\* or youth\* ) ) OR MW ( (adolescen\* or child or children or teen\* or youth\* ) )
- 13 S11 OR S12
- 14 S10 AND S13
- 15 S10 AND S13
- 16 S14 OR S15
- 17 TI ( ((parks or play or playground\*) N5 (cleaning or closure\* or closed or distancing or restrict\* or limit\* or masks or masking or shutdown\* or shut down\*)) ) OR AB ( ((parks or play or playground\*) N5 (cleaning or closure\* or closed or distancing or restrict\* or limit\* or masks or masking or shutdown\* or shut down\*)) ) OR MW ( ((parks or play or playground\*) N5 (cleaning or closure\* or closed or distancing or restrict\* or limit\* or masks or masking or shutdown\* or shut down\*)) )
- 18 TI ( ((college\* or school\* or universit\*) N5 (cleaning or closed or closure\* or distancing or interrupt\* or lockdown\* or limit\* or masks or masking or restrict\* or saniti\* or shutdown\* or shut down\* or suspen\* or ventilat\* or (covid\* N2 test\*) or (covid\* N2 vaccin\*))) ) OR AB ( ((college\* or school\* or universit\*) N5 (cleaning or closed or closure\* or distancing or interrupt\* or lockdown\* or limit\* or masks or masking or restrict\* or saniti\* or shutdown\* or shut down\* or suspen\* or ventilat\* or (covid\* N2 test\*) or (covid\* N2 vaccin\*))) ) OR MW ( ((college\* or school\* or universit\*) N5 (cleaning or closed or closure\* or distancing or interrupt\* or lockdown\* or limit\* or masks or masking or restrict\* or saniti\* or shutdown\* or shut down\* or suspen\* or ventilat\* or (covid\* N2 test\*) or (covid\* N2 vaccin\*))) )

- 19 TI ( (in-person learning N5 (interrupt\* or limit\* or restrict\* or suspen\*)) ) OR AB ( (in-person learning N5 (interrupt\* or limit\* or restrict\* or suspen\*)) ) OR MW ( (in-person learning N5 (interrupt\* or limit\* or restrict\* or suspen\*)) )
- 20 TI home schooling OR AB home schooling OR KW home schooling
- 21 TI ( ((at home or hybrid or online or remote) N1 (educat\* or learning)) ) OR AB ( ((at home or hybrid or online or remote) N1 (educat\* or learning)) ) OR MW ( ((at home or hybrid or online or remote) N1 (educat\* or learning)) )
- 22 TI ( ((extracurricular or extra-curricular or intramural or school\* or weekend) N5 (activities or clubs or hobbies or sports or team or athletes or groups)) ) OR AB ( ((extracurricular or extra-curricular or intramural or school\* or weekend) N5 (activities or clubs or hobbies or sports or team or athletes or groups)) ) OR MW ( ((extracurricular or extra-curricular or intramural or school\* or weekend) N5 (activities or clubs or hobbies or sports or team or athletes or groups)) )
- 23 S17 OR S18 OR S19 OR S20 OR S21 OR S22
- 24 S16 AND S23
- 25 S16 AND S23
- 26 S24 NOT S25
